# Supplementary material
Source: PubMed Central journal article supplement (PMC2676115)
Supplement: NIHMS91143-supplement-1_si_001.pdf [file NIHMS91143-supplement-1_si_001.pdf]

## Supporting Information for the Manuscript:

“Metal-Enhanced Fluorescence Nanoparticulate from Zinc Films”, Kadir Aslan, Michael J.R. Previte, Yongxia Zhang, Chris D. Geddes.

Corresponding author: [geddes@umbi.umd.edu](mailto:geddes@umbi.umd.edu)

The following figures were referred to in the main text.

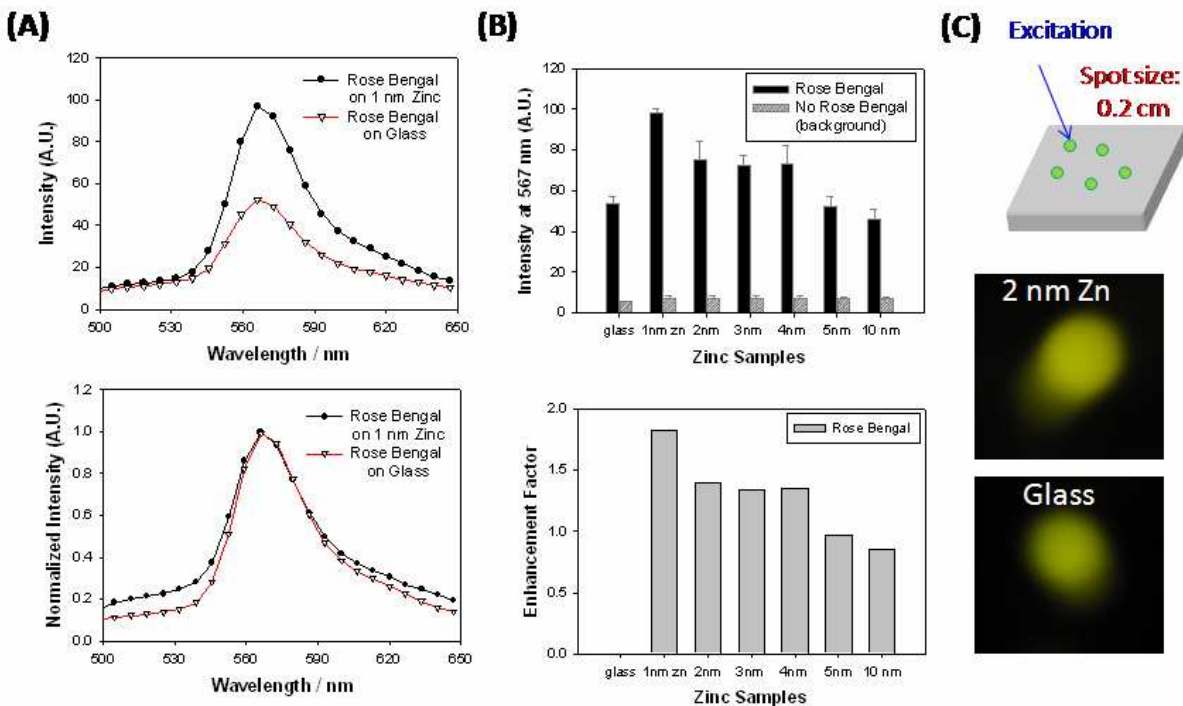

**Figure S1.** **(A)** Raw (top) and normalized (bottom) fluorescence emission spectrum of Rose Bengal from zinc (1 nm thick) and glass substrates. **(B)** Fluorescence emission intensity of Rose Bengal measured (at 567 nm) from glass and zinc substrates (top) and calculated fluorescence enhancement factor for Rose Bengal. **(C)** Real-color photographs of Rose Bengal emission from 2 nm zinc (top) and glass (bottom) substrates taken through an emission filter. Average of 5 measurements are shown. A.U. Arbitrary Units.

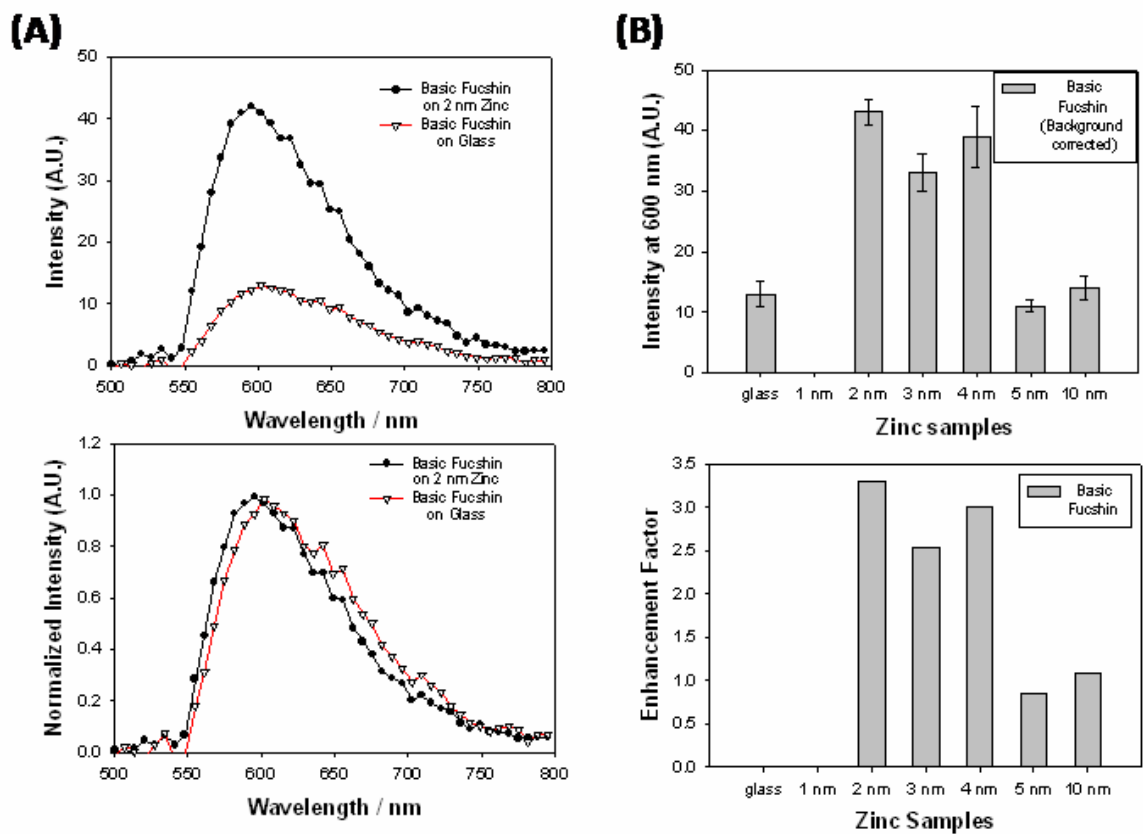

**Figure S2.** **A)** Raw (top) and normalized (bottom) fluorescence emission spectrum of Basic Fuchsin from zinc (1nm thick) and glass substrates. **(B)** Fluorescence emission intensity of Basic Fuchsin measured (at 600 nm) from glass and zinc substrates (top) and calculated fluorescence enhancement factor for Basic Fuchsin. A.U. Arbitrary Units.

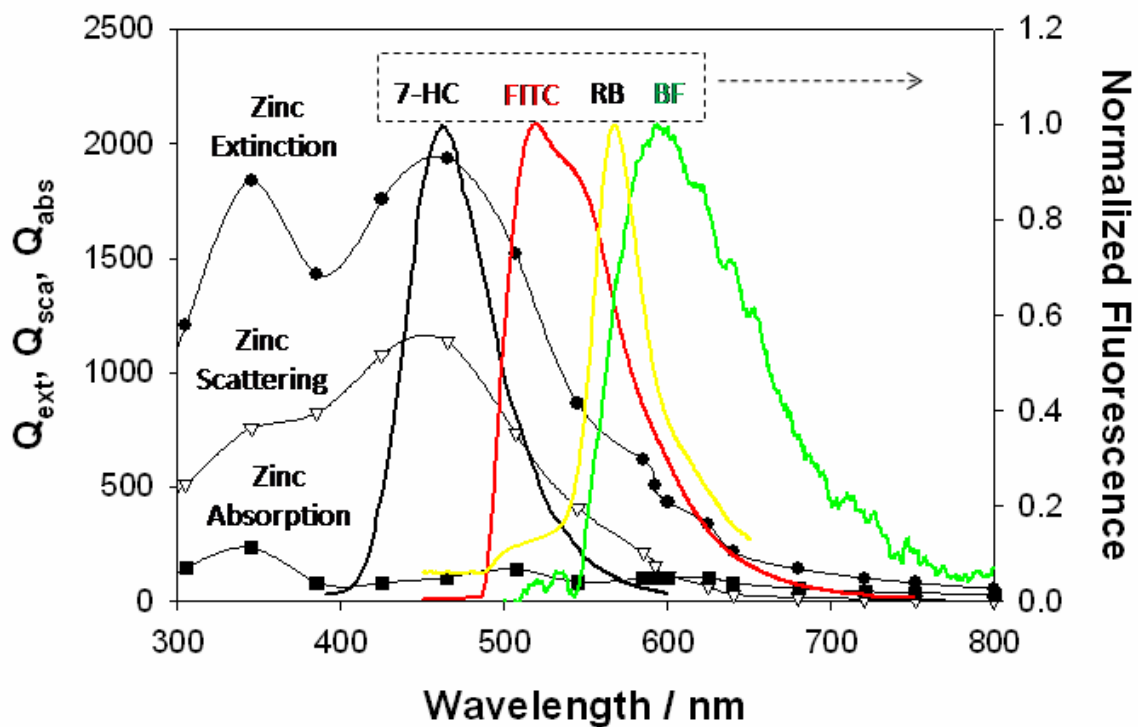

**Figure S3.** Calculated Mie extinction, scattering and absorption cross section of a 100 nm zinc nanoparticles and emission spectrum of the fluorophores used in this study.
