# Supplementary material
Source: PubMed Central journal article supplement (PMC2676115)
Supplement: NIHMS91143-supplement-2_si_002.pdf [file NIHMS91143-supplement-2_si_002.pdf]

## TOC Image

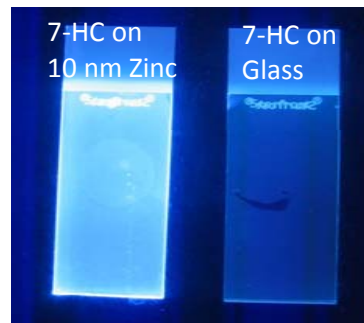

**Real-color photographs of 7-HC emission from 10 nm zinc (left) and glass (right) substrates taken through an emission filter.**
